# Supplementary material for: Short telomere syndromes cause a primary T cell immunodeficiency
Source: JCI journal article supplement (doi:10.1172/jci120216), 2018-09-04

**Supplementary Data**

**Short telomere syndromes cause a primary T cell immunodeficiency**

Christa L. Wagner<sup>1</sup>, Vidya Sagar Hanumanthu<sup>1</sup>, C. Conover Talbot Jr<sup>2</sup>,  
Roshini S. Abraham<sup>3</sup>, David Hamm<sup>4</sup>, Dustin L. Gable<sup>1</sup>, Christopher G. Kanakry<sup>1</sup>,  
Carolyn D. Applegate<sup>5</sup>, Janet Siliciano<sup>6</sup>, J. Brooks Jackson<sup>7</sup>,  
Stephen Desiderio<sup>2,8,9</sup>, Jonathan K. Alder<sup>1</sup>, Leo Luznik<sup>1,8</sup>, Mary Armanios<sup>1,5,7,8,9</sup>

Departments of Oncology<sup>1</sup>, Medicine<sup>6</sup>, Pathology<sup>7</sup>, and Molecular Biology & Genetics<sup>9</sup>  
Institute for Basic Biomedical Sciences<sup>2</sup>  
McKusick-Nathans Institute of Genetic Medicine<sup>5</sup>  
Sidney Kimmel Comprehensive Cancer Center<sup>8</sup>  
Johns Hopkins University School of Medicine  
Baltimore, MD 21287

Department of Laboratory Medicine and Pathology<sup>3</sup>  
Mayo Clinic  
Rochester, MN 55905

Adaptive Biotechnologies<sup>4</sup>  
Seattle, WA 98102

Supplementary Figure 1

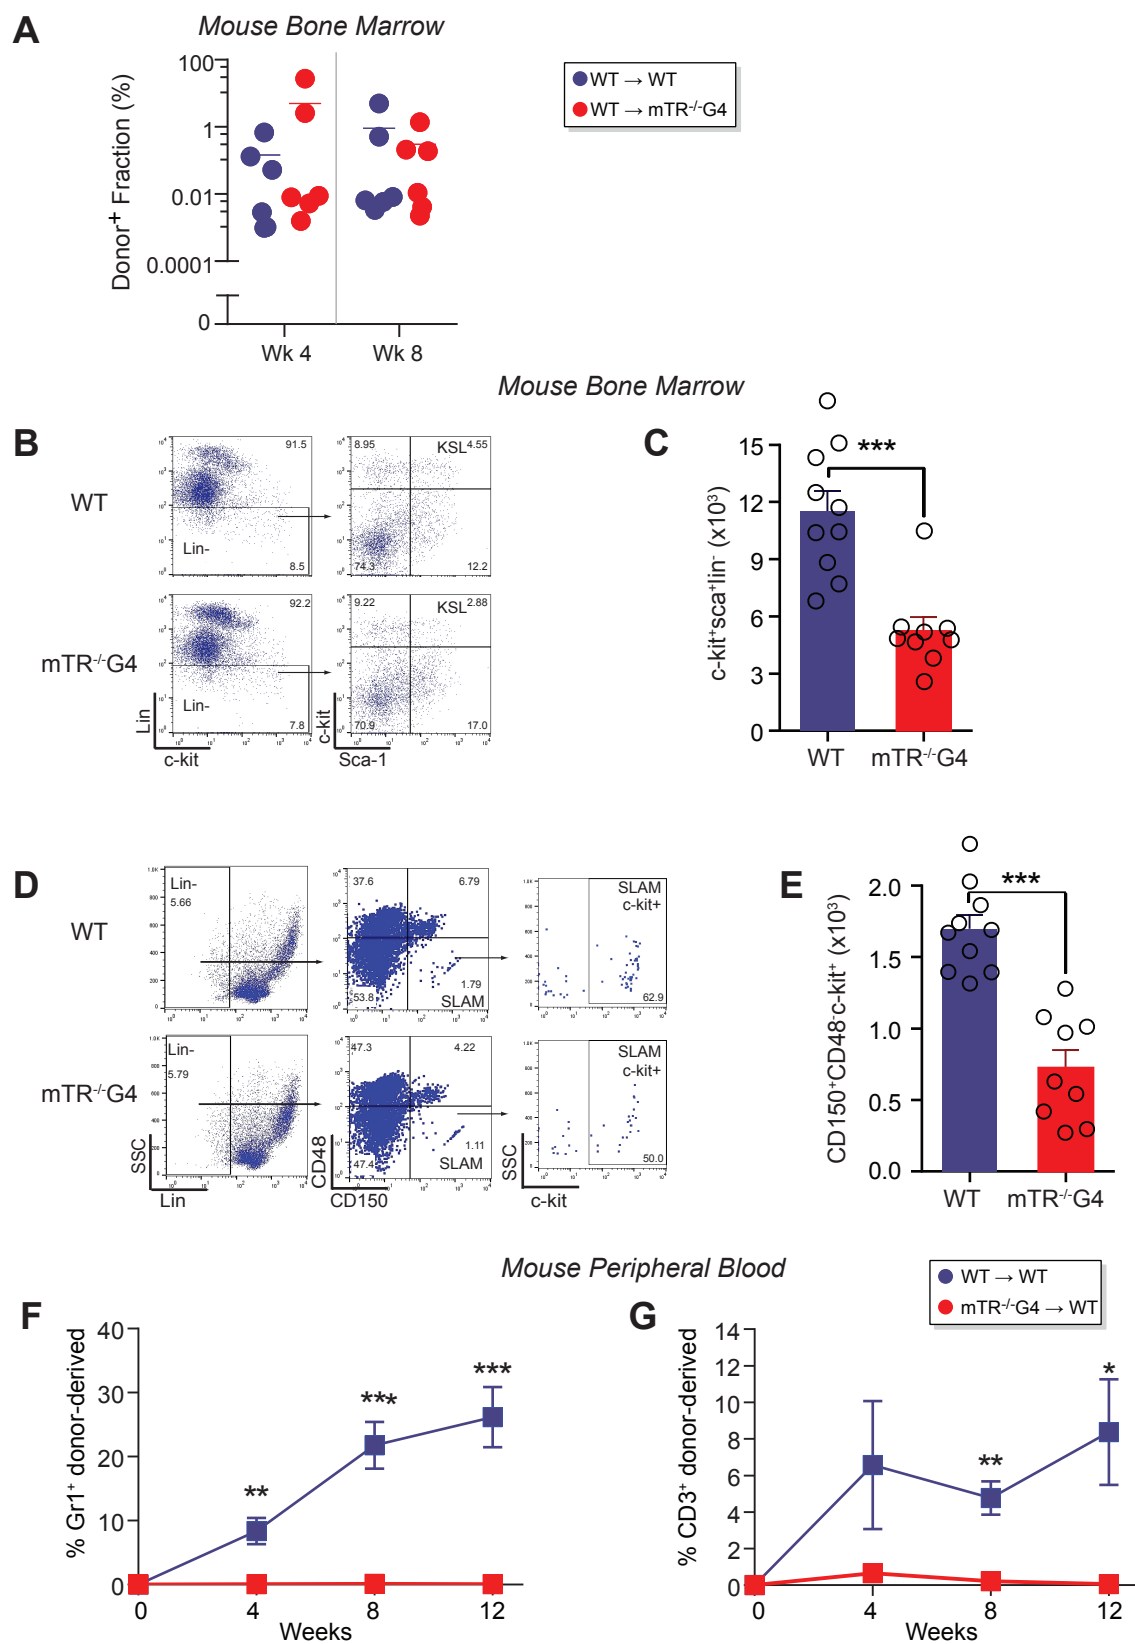

Supplementary Figure 2

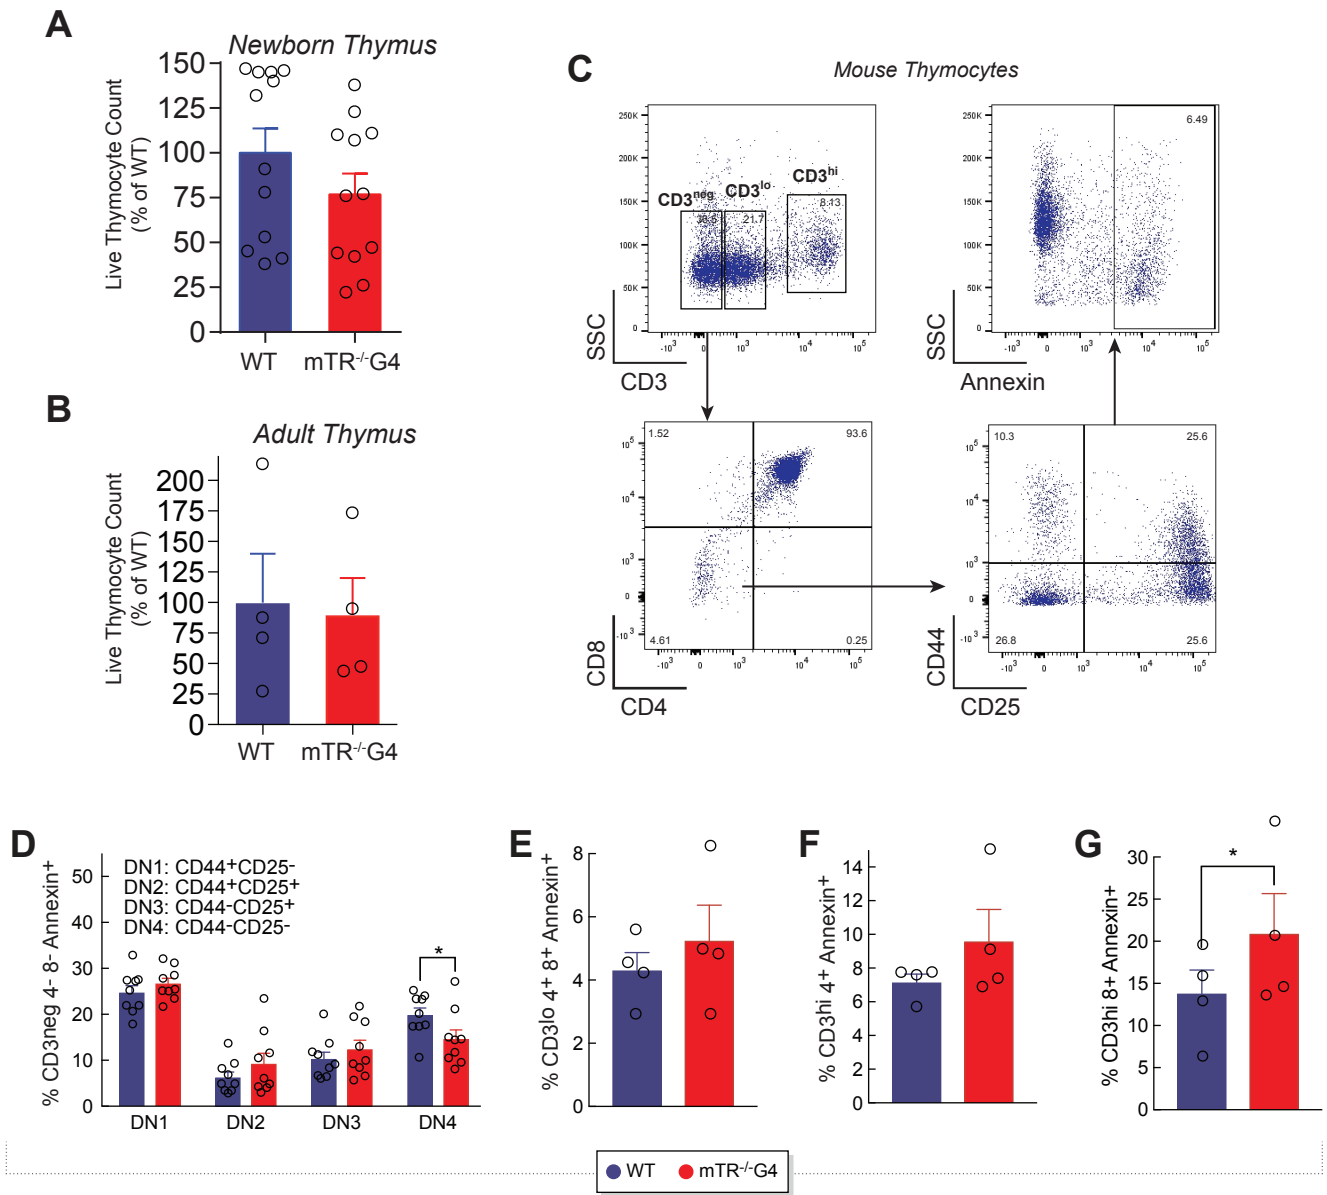

Supplemental Figure 3

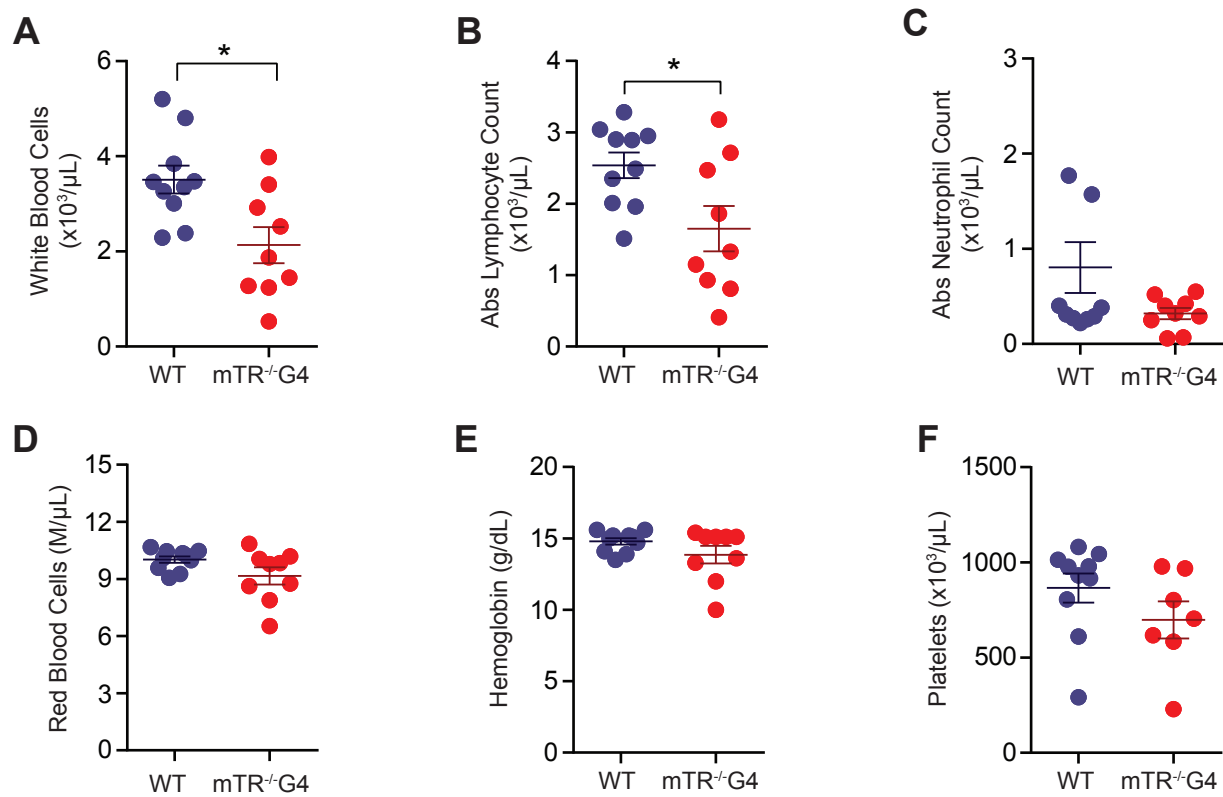

Supplementary Figure 4

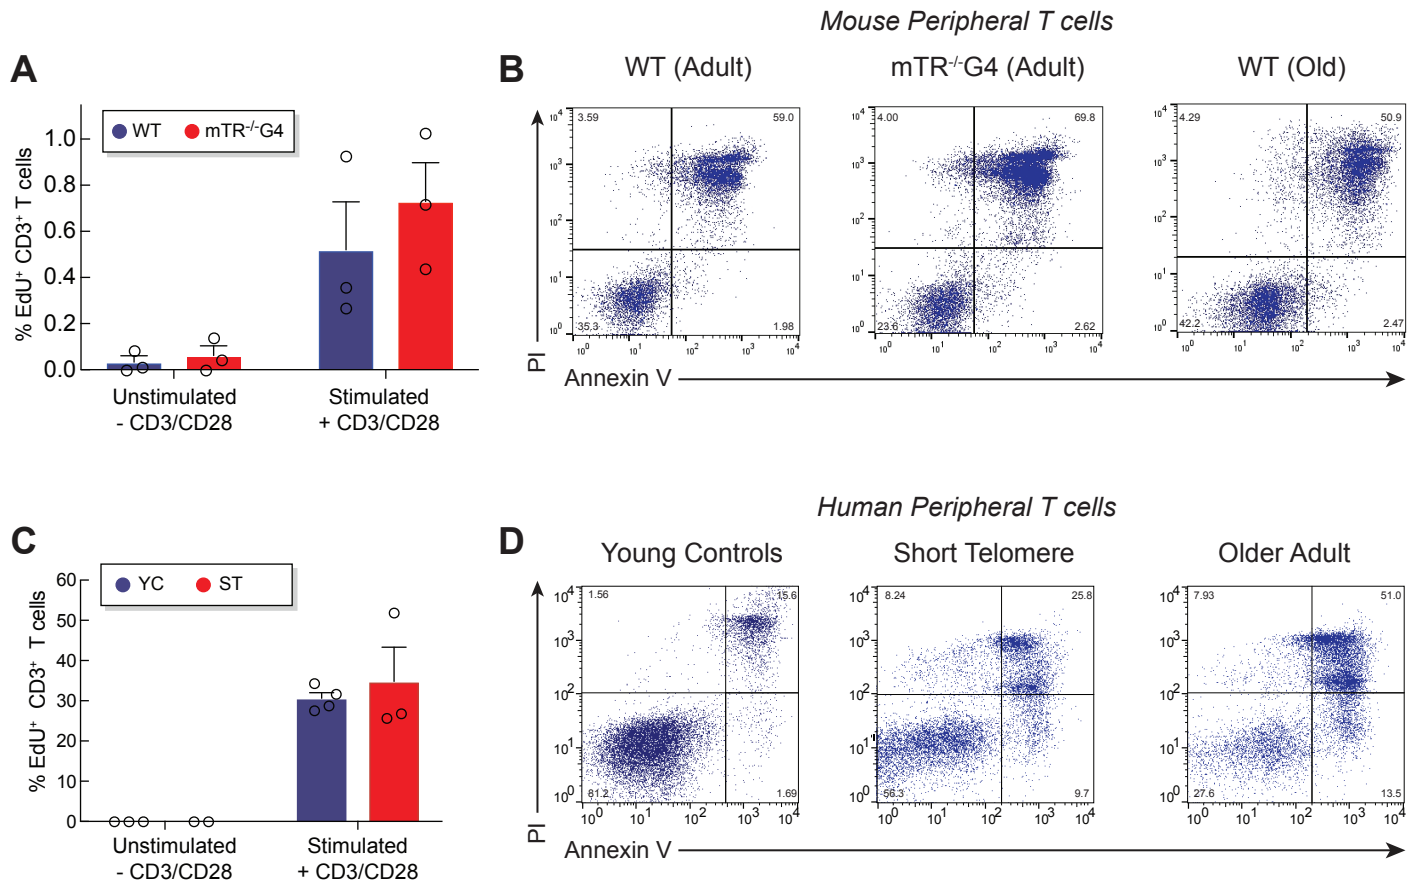

Supplementary Figure 5

**A**

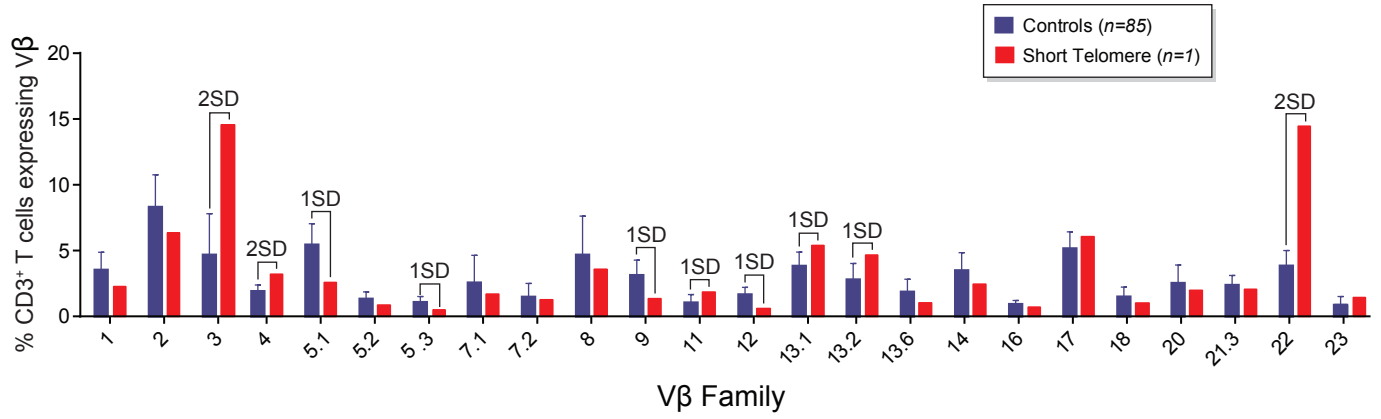

**B**

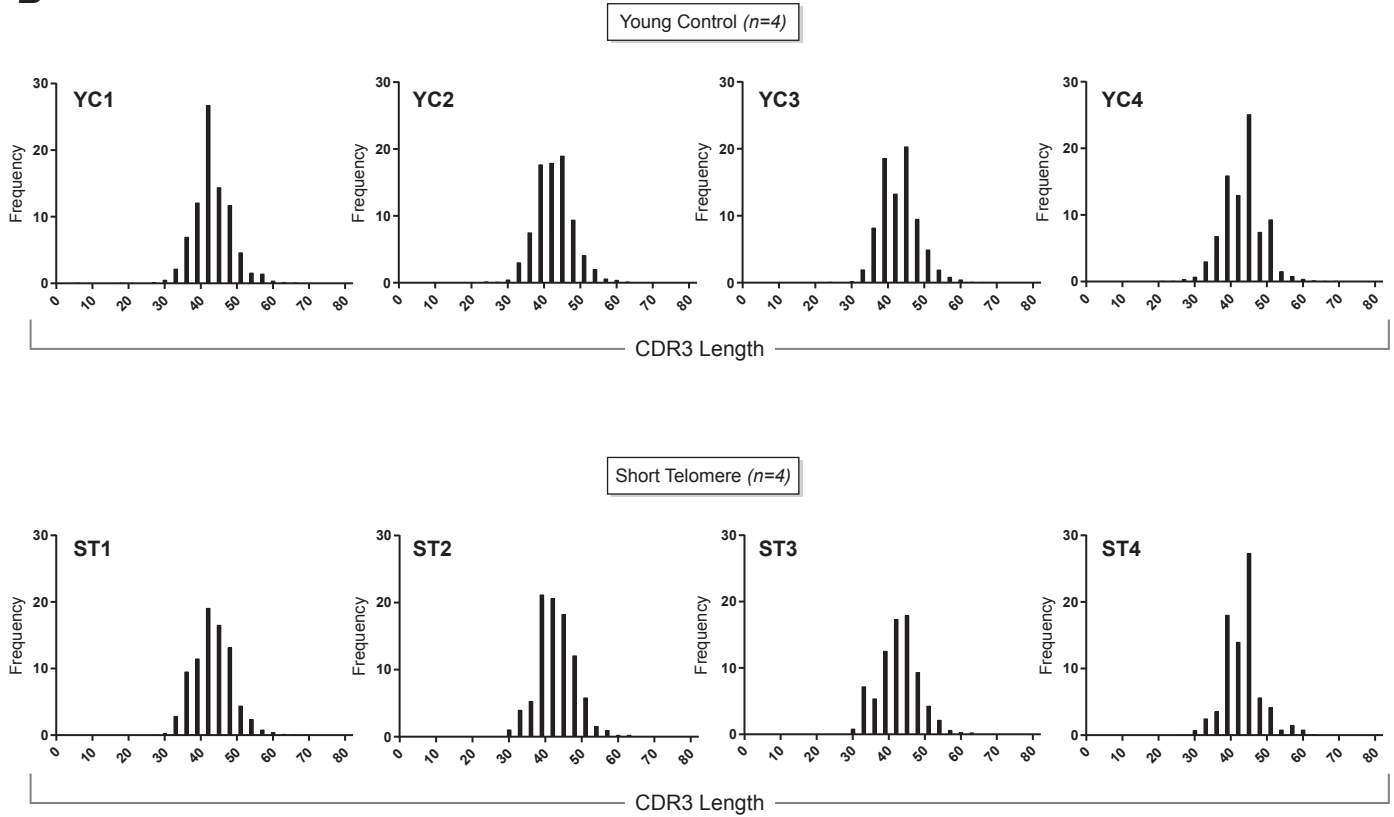

Supplemental Figure 6

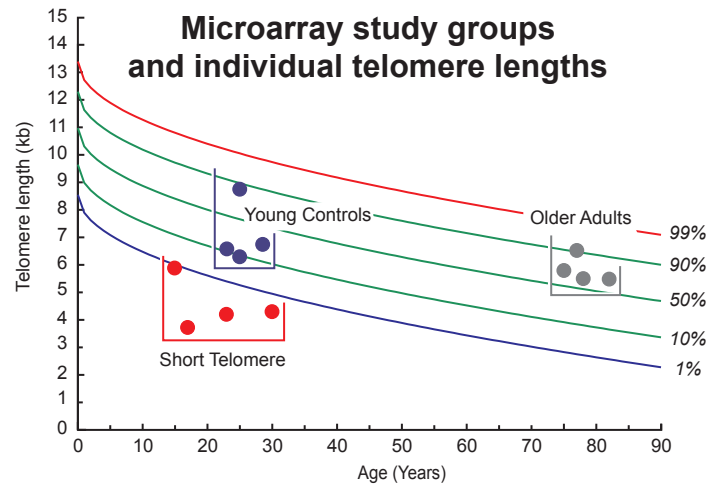

Peripheral blood mononuclear cells

### FACS Sort CD8 T<sub>EMRA</sub>s

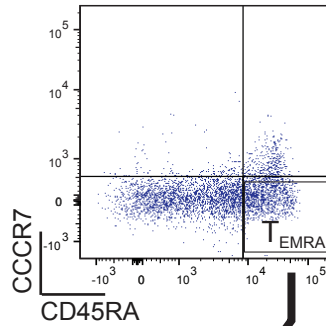

Total RNA

### Gene expression microarray

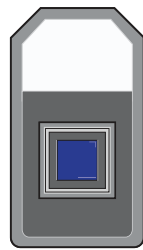

### Ingenuity Pathway Analysis

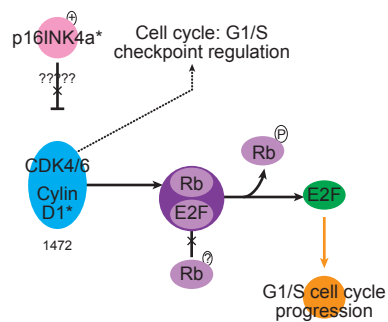

Supplementary Figure 7

**A**

Short Telomere vs. Young Control

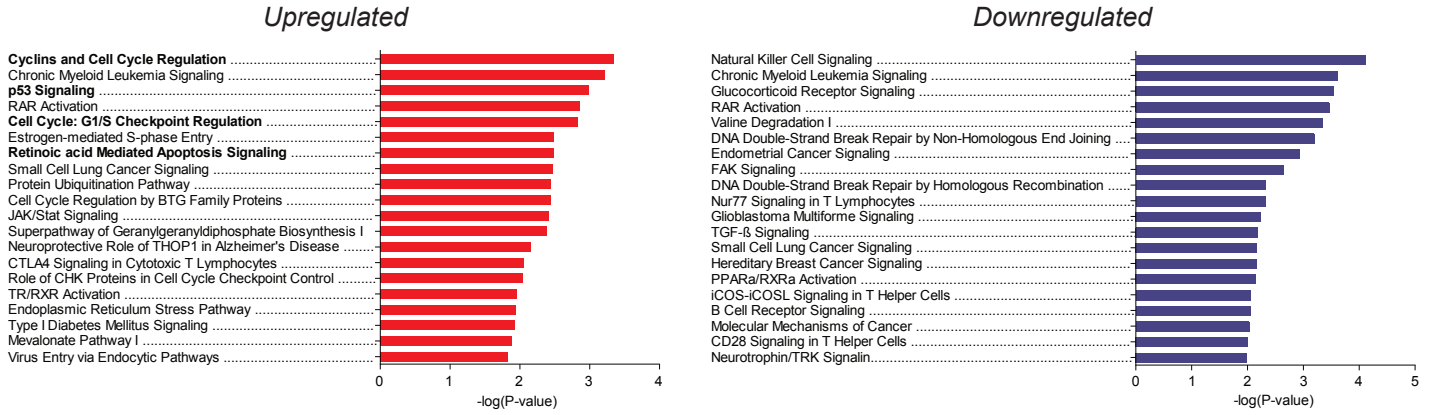

**B**

Older Adult vs. Young Control

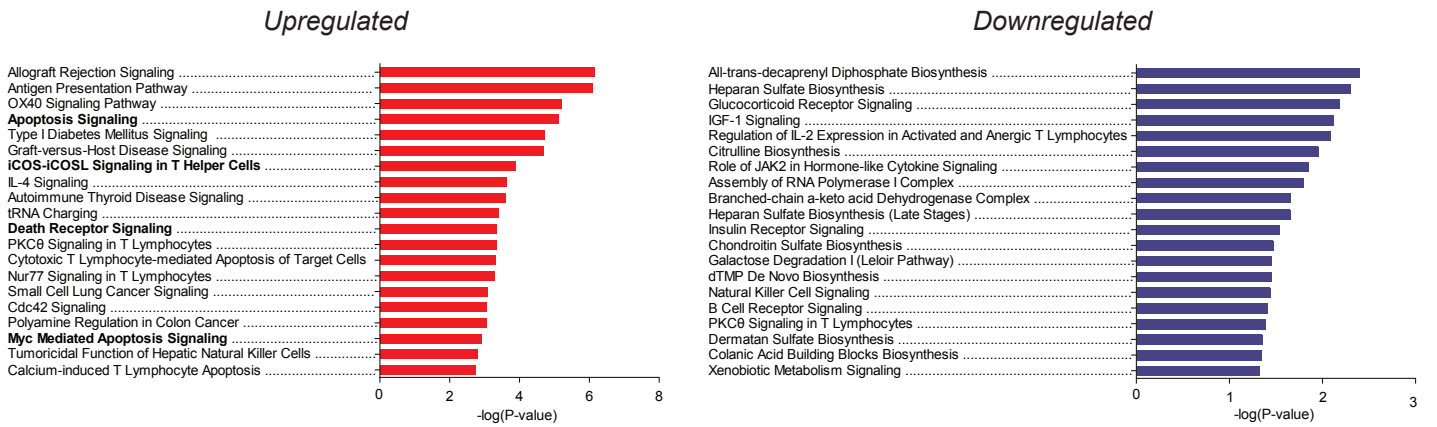



Supplementary Figure 8

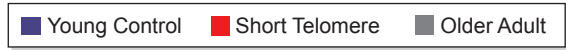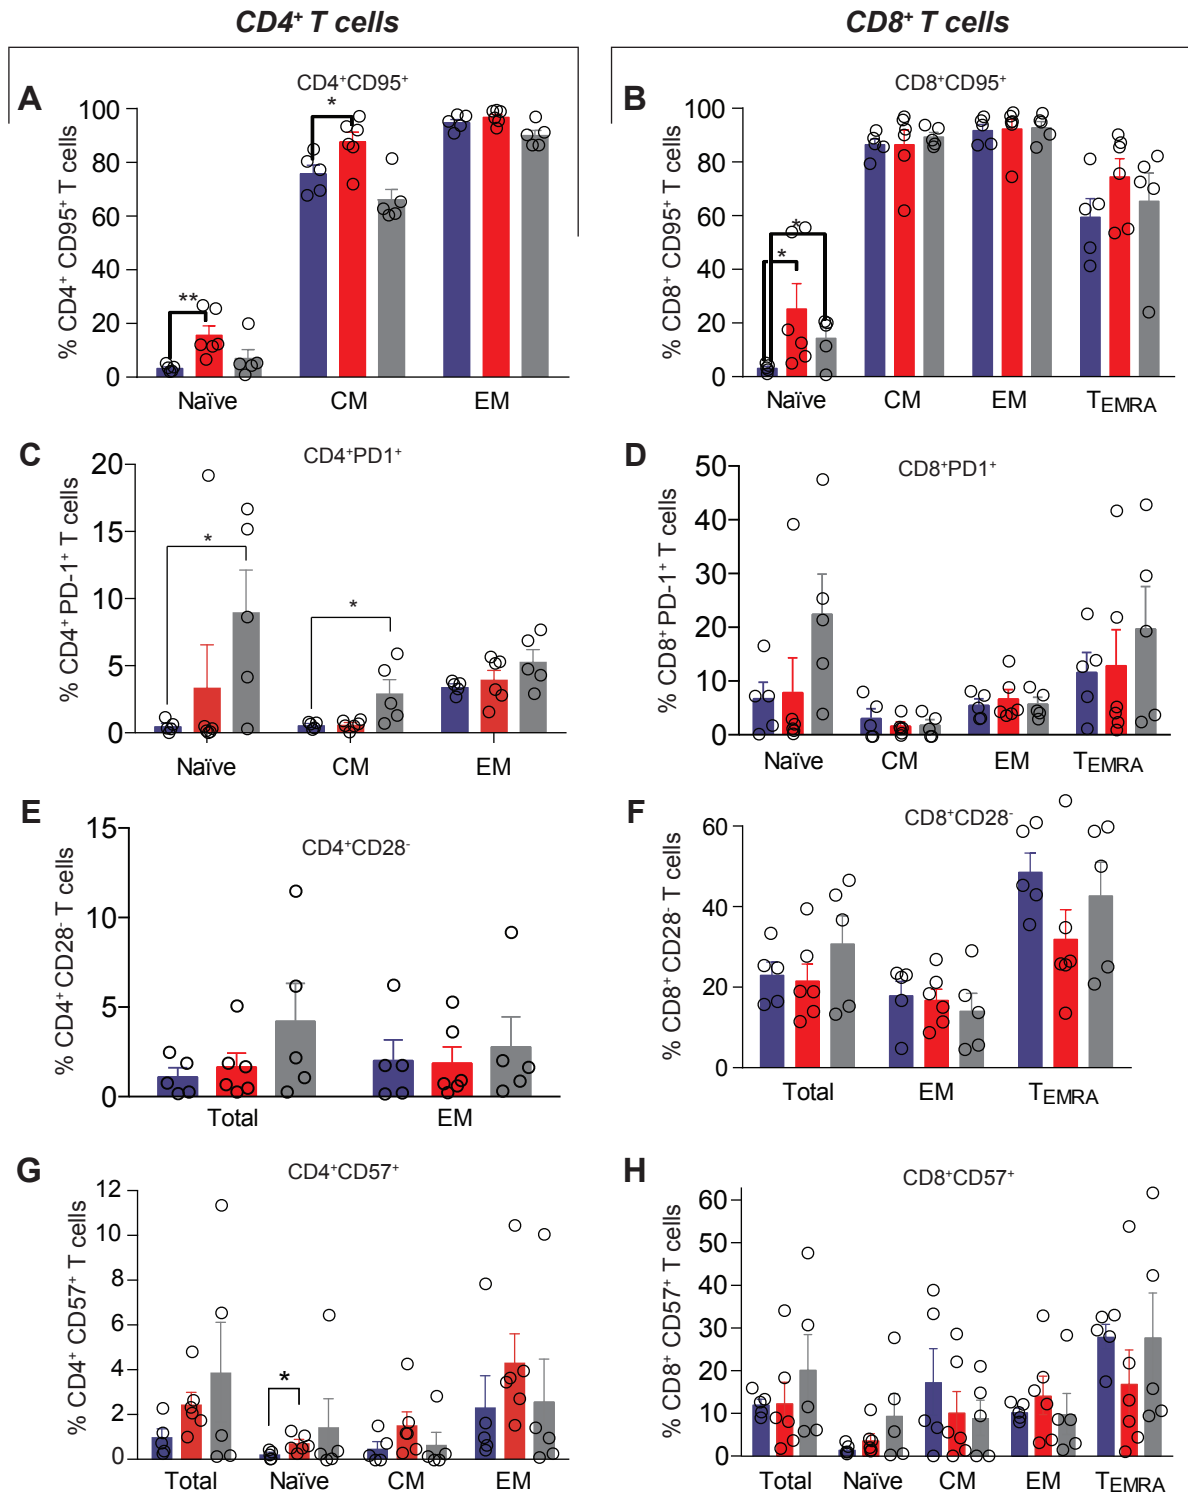

## Supplementary Figure Legends

**Supplemental Figure 1. Depleted stem cell pools in late generation telomerase RNA null mice, *mTR*<sup>-/-</sup> G4.** **A.** Bone marrow donor-derived engraftment after sublethal irradiation for congenic transplant experimental data shown in Figure 3A-C. **B and C.** Representative flow plots and quantification of lineage<sup>-</sup> c-kit<sup>+</sup> Sca-1<sup>+</sup> (KSL) population in *wild-type* (*WT*) and *mTR*<sup>-/-</sup> G4 mice. **D and E.** Representative flow plots and quantification of the bone marrow lineage<sup>-</sup> c-kit<sup>+</sup>CD150<sup>+</sup>CD48<sup>-</sup> (SLAM) population. For **C and E**, *WT* (n=10, 6-16 weeks, 7M/3F) and *mTR*<sup>-/-</sup> G4 mice (n=9, 6-16 weeks, 4M/5F). **F and G.** Peripheral blood engraftment after injection of *wild-type* (*WT*) or *mTR*<sup>-/-</sup> G4 into *wild-type* (*WT*) mice. Each datapoint represents the mean from 5 individual mice. Donor mice were male and recipients were female. Error bars represent s.e.m and \*\*\*P <0.001 (Mann-Whitney test).

**Supplemental Figure 2. A and B.** Live thymocyte counts from *wildtype* (*WT*) and *mTR*<sup>-/-</sup>G4 newborn (n=12/genotype, sex undetermined because of early age) and adult mice (all female, n=4/group, 19-20 weeks, representative of 2 experiments), respectively. **C.** Gating strategy for quantifying intra-thymic CD3<sup>neg</sup>, CD3<sup>lo</sup> and CD3<sup>hi</sup> populations. The flowplots shown are representative from a *WT* newborn mouse. The CD3<sup>neg</sup> CD4<sup>-</sup>CD8<sup>-</sup> (DN) population was analyzed with CD25 vs. CD44 gating to determine the relative populations of DN1-4 subsets. **D.** Comparison of thymocyte apoptosis rates in CD3<sup>neg</sup> CD4<sup>-</sup> CD8<sup>-</sup> (double negative, DN) populations 1, 2, 3 and 4 as defined by their cell surface markers shown in the left upper corner (n=9 mice/group, 18-21 weeks, all female). **E.** Apoptotic fraction of CD3<sup>lo</sup> CD4<sup>+</sup> CD8<sup>+</sup> (double positive, DP) thymocytes in adult mice. **F and G.** Apoptotic fraction of CD3<sup>hi</sup> CD4<sup>+</sup> and CD3<sup>hi</sup> CD8<sup>+</sup> thymocytes. For **E-G**, n=4 mice/group, 20-22 weeks, all female and the data are representative of two independent experiments. For panels **D-G**, the apoptotic fraction was quantified as the total Annexin V<sup>+</sup> population. Error bars represent s.e.m and \*P <0.05 (Mann-Whitney test).

**Supplemental Figure 3. Lymphopenia in short telomere mice. A-F.** Complete blood counts of *wild-type* (*WT*, n=10, 7M/3F, 6-16 weeks) and *mTR*<sup>-/-</sup>G4 mice (n=9, 4M/5F, 6-16 weeks) showing abnormally low absolute (Abs) lymphocyte counts. **Fig. 3I and J** show the absolute CD4 and CD8 counts, respectively. Error bars represent s.e.m and \*P<0.05 (Mann-Whitney test).

**Supplemental Figure 4. Mouse and human EdU incorporation with T cell stimulation and representative flow plots of Annexin V staining. A.** EdU incorporation in isolated CD3<sup>+</sup> T cells stimulated with CD3/CD28 ex vivo and quantified at 48h. Unstimulated cells were also included as a negative control. *WT* and *mTR*<sup>-/-</sup>G4 (n=3/genotype). The experiment was replicated twice with similar results and data shown are for one experiment. **B.** Representative flow plots from peripheral mouse splenocyte-derived isolated CD3<sup>+</sup> T cells, analyzed 48 hours after stimulation with CD3/CD28 antibodies. **C.** EdU incorporation in isolated human CD3<sup>+</sup> T cells stimulated with CD3/CD28 ex vivo and quantified at 48h. YC represent Young Controls (n=7, 3M/4F) and ST represents short telomere patients (n=5, 1M/4F) studied under both unstimulated

and stimulated conditions. The data are from two independent experiments. **D.** Representative flow plots of CD3<sup>+</sup> T cells derived from the 3 groups shown in panel C. They show Annexin V staining at 48 hours after stimulation with CD3/CD28. For **B** and **D**, the total Annexin V<sup>+</sup> PI<sup>neg</sup> (early) plus Annexin V<sup>+</sup> PI<sup>lo</sup> (late) apoptotic populations are quantified in **Figures 3K** and **L**, respectively. Error bars represent s.e.m.

**Supplemental Figure 5. Raw TCR-V $\beta$  flow cytometry data and complementarity-determining region 3 (CDR3) length by immunoSEQ.** **A.** Example of raw analysis performed to generate the data shown in **Fig. 4A**. The percentage of CD3<sup>+</sup> T cells expressing each of 24 V $\beta$  proteins in a patient carrying a *TERT* mutation is plotted relative to data from 85 controls. The error bars in the controls represent +/- 1 standard deviation (SD). This analysis was performed for each of the Young Controls, Short Telomere and Older Adult cases studied in **Fig. 4A**. **B.** CDR3 length distribution is graphed from data generated by immunoSEQ (Adaptive Technologies, Seattle) on sorted CD8<sup>+</sup> T cells from 4 young controls and 4 short telomere subjects (2M, 2F for each).

**Supplemental Figure 6. Design and analysis of microarray experiment.** At the top, the telogram shows actual lymphocyte telomere length data relative to the age-adjusted nomogram for each of the 12 individuals studied across the three groups. Telomere length was measured by flow cytometry and FISH. CD8<sup>+</sup> T<sub>EMRA</sub> cells were sorted by multi-color flow cytometry using the gating scheme shown. All the short telomere individuals were asymptomatic at the time of lymphocyte procurement. RNA was amplified, reverse-transcribed, and subjected to transcriptional profiling using the Affymetrix GeneChip® PrimeView™ Human Gene Expression Array. The differentially expressed genes were then input into the Ingenuity Pathways Analysis (IPA) platform.

**Supplemental Figure 7. Top 20 up- and down-regulated pathways derived from Ingenuity Pathways Analysis (IPA) from differentially expressed genes in sorted CD8<sup>+</sup> terminally differentiated effector memory CD45RA<sup>+</sup>(T<sub>EMRA</sub>) cells.** **A.** Comparison of short telomere patients with young controls. Up- and down-regulated pathways are shown respectively sorted by the -log(P-value). **B.** The top 20 up- and down-regulated pathways of differentially expressed genes in older adults compared to young controls similarly sorted by P-values. For these analyses, the most highly differentially expressed genes, defined as a minimum of 2 standard deviations, increased or decreased in each of short telomere and older adult subjects relative to the mean for the young control group. P-values were calculated using the Fisher's exact test (one-sided). There was no overlap across the comparisons in the top 20 up-regulated pathways. Three down-regulated pathways were shared: natural killer cell signaling, glucocorticoid receptor signaling and B cell receptor signaling. The list of the differentially expressed genes for each pathway is included in Supplementary Tables 3 and 4, for the short telomere vs. young control and older adult vs. young control comparisons, respectively.

**Supplemental Figure 8. Immunophenotype of peripheral T cells from telomerase mutation carriers (ST) compared to age-matched young controls (YC) and older adults (OA).** **A** and **B.** CD95 expression in CD4<sup>+</sup> and CD8<sup>+</sup> T cell subsets, respectively. **C** and **D.** PD-1 expression on CD4<sup>+</sup> and CD8<sup>+</sup> T cell subsets, respectively. **E** and **F.**

Percentage of total and T cells subsets without CD28 expression on CD4<sup>+</sup> and CD8<sup>+</sup> T cells, respectively. Per convention, CD28 loss occurs in the terminally differentiated populations of CD4<sup>+</sup> and CD8<sup>+</sup> T cells, respectively, and these were the populations studied. Total refers to all CD4<sup>+</sup> and CD8<sup>+</sup> T cell sub-populations, including the naïve populations, respectively. **G** and **H**. CD57 expression on total and CD4<sup>+</sup> and CD8<sup>+</sup> T cell subsets, respectively. For **A-H**, YC (n=5-6, 2M/3-4F), ST (n=6-7, 1-2M/5F), and OA (n=5, 3M/2F). Error bars represent s.e.m, \*P<0.05 (Student's t-test, two sided). CM, Central Memory; EM, Effector Memory; T<sub>EMRA</sub>, Effector Memory, CD45RA<sup>+</sup>.

**Supplementary Table 1. Demographics of subjects studied\***

|                                    | <b><i>Young Controls</i></b><br>(n=22) | <b><i>Short Telomere</i></b><br>(n=16) | <b><i>Older Adults</i></b><br>(n=12) |
|------------------------------------|----------------------------------------|----------------------------------------|--------------------------------------|
| <b>Mean Age (y)</b><br>Range       | 25.8<br>(14-33)                        | 20.8<br>(1-39)                         | 73.3<br>(61-82)                      |
| <b>Sex</b>                         |                                        |                                        |                                      |
| <b>Male</b>                        | 12                                     | 8                                      | 7                                    |
| <b>Female</b>                      | 10                                     | 8                                      | 5                                    |
| <b>Mean deltaT (kb)**</b><br>Range | -0.40<br>(-2.0, 1.1)                   | -3.63<br>(-4.51, -2.36)                | -0.37<br>(-2.26, 1.36)               |

\*These demographics correspond to the subjects for whom telomere length is shown in Fig. 2a,b. Notably, the Young Controls listed here include 4 additional healthy individuals for whom telomere length data were not available.

\*\*deltaT refers to the difference of lymphocyte telomere length from the age-adjusted median as measured by flowFISH.

**Supplementary Table 2. Mutations of short telomere syndrome subjects studied (n=16)**

| Age (y) | M/F | First Clinical phenotype              | Mutation         | Mode of Inheritance | Prior reports <sup>(1-7)</sup> |
|---------|-----|---------------------------------------|------------------|---------------------|--------------------------------|
| 0.7     | M   | Enterocolitis                         | DKC1 Ala308Gly   | <i>de novo</i>      | Alder et al. 2018              |
| 6       | M   | Aplastic anemia                       | TR del375-377    | AD                  | Alder et al. 2011              |
| 8       | F   | Aplastic anemia                       | TERT Phe71Leu    | AD                  | Alder et al. 2018              |
| 10      | M   | Enteropathy                           | DKC1 IVS1+592C>G | X-linked            | Knight et al. 2001             |
| 15      | M   | Sinopulmonary infections              | Classic DC       | X-linked            | n/a                            |
| 17      | F   | Asymptomatic*                         | TERT Lys902Asn   | AD                  | Armanios et al. 2005           |
| 20      | M   | Asymptomatic                          | TERT Gly135Glu   | AD                  | Gorgy et al. 2015              |
| 20      | F   | CMV pneumonitis<br><i>P. jiroveci</i> | TR U80A          | AD                  | Alder et al. 2018              |
| 22      | M   | Aplastic anemia                       | Classic DC       | AD                  | n/a                            |
| 23      | M   | Aplastic anemia                       | TERT Gly135Glu   | AD                  | Gorgy et al. 2015              |
| 23      | F   | Asymptomatic                          | TERT Gly135Glu   | AD                  | Gorgy et al. 2015              |
| 30      | F   | Asymptomatic*                         | TR del375-377    | AD                  | Alder et al. 2011              |
| 32      | F   | Asymptomatic                          | TR del375-377    | AD                  | Alder et al. 2011              |
| 34      | F   | Asymptomatic                          | TR C204G         | AD                  | Fogarty et al. 2003            |
| 34      | M   | Aplastic anemia                       | DKC1 Leu317Phe   | <i>de novo</i>      | Marrone et al. 2013            |
| 39      | F   | Aplastic anemia                       | TR C204G         | AD                  | Fogarty et al. 2003            |

Abbreviations AD, autosomal dominant; CMV, cytomegalovirus; DC, dyskeratosis congenita

\*These two individuals were asymptomatic at the time of procurement of lymphocytes but subsequently developed herpes zoster infection

1. Alder, J.K., Hanumanthu, V.S., Strong, M.A., DeZern, A.E., Stanley, S.E., Takemoto, C.M., Danilova, L., Applegate, C.D., Bolton, S.G., Mohr, D.W., et al. 2018. Diagnostic utility of telomere length testing in a hospital-based setting. *Proc Natl Acad Sci U S A*.
2. Alder, J.K., Guo, N., Kembou, F., Parry, E.M., Anderson, C.J., Gorgy, A.I., Walsh, M.F., Sussan, T., Biswal, S., Mitzner, W., et al. 2011. Telomere length is a determinant of emphysema susceptibility. *Am J Respir Crit Care Med* 184:904-912.

3. Fogarty, P.F., Yamaguchi, H., Wiestner, A., Baerlocher, G.M., Sloand, E., Zeng, W.S., Read, E.J., Lansdorp, P.M., and Young, N.S. 2003. Late presentation of dyskeratosis congenita as apparently acquired aplastic anaemia due to mutations in telomerase RNA. *Lancet* 362:1628-1630.
4. Marrone, A., and Mason, P.J. 2003. Dyskeratosis congenita. *Cell Mol Life Sci* 60:507-517.
5. Gorgy, A.I., Jonassaint, N.L., Stanley, S.E., Koteish, A., DeZern, A.E., Walter, J.E., Sopha, S.C., Hamilton, J.P., Hoover-Fong, J., Chen, A.R., et al. 2015. Hepatopulmonary syndrome is a frequent cause of dyspnea in the short telomere disorders. *Chest*.
6. Armanios, M., Chen, J.L., Chang, Y.P., Brodsky, R.A., Hawkins, A., Griffin, C.A., Eshleman, J.R., Cohen, A.R., Chakravarti, A., Hamosh, A., et al. 2005. Haploinsufficiency of telomerase reverse transcriptase leads to anticipation in autosomal dominant dyskeratosis congenita. *Proc Natl Acad Sci U S A* 102:15960-15964.
7. Knight, S.W., Vulliamy, T.J., Morgan, B., Devriendt, K., Mason, P.J., and Dokal, I. 2001. Identification of novel DKC1 mutations in patients with dyskeratosis congenita: implications for pathophysiology and diagnosis. *Hum Genet* 108:299-303.

**Supplementary Table 3A. Canonical pathways for up-regulated genes in sorted CD8<sup>+</sup> T<sub>EMRA</sub> cells from individuals with short telomeres compared to young controls**

| <i>Ingenuity Canonical Pathway</i>                                        | <i>-log(P-value)**</i> | <i>R***</i> | <i>Molecules</i>                                                                                                                     |
|---------------------------------------------------------------------------|------------------------|-------------|--------------------------------------------------------------------------------------------------------------------------------------|
| Cyclins and Cell Cycle Regulation                                         | 3.34E00                | 1.43E-01    | E2F6,E2F4,HDAC5,SUV39H1,CCNE1,CDKN2A,PPP2R5D,CCNA2,RB1,HDAC3,PP2CA                                                                   |
| Chronic Myeloid Leukemia Signaling                                        | 3.22E00                | 1.3E-01     | E2F6,E2F4,HDAC5,NFKB1,GAB2,PIK3C2A,SUV39H1,CDKN2A,RB1,HDAC3,STAT5B,AKT2                                                              |
| p53 Signaling                                                             | 2.98E00                | 1.22E-01    | CSNK1D,PIK3C2A,MED1,HIF1A,JMY,CDKN2A,RB1,TP53INP1,THBS1,AKT2,PMAIP1,TNFRSF10B                                                        |
| RAR Activation                                                            | 2.86E00                | 9.83E-02    | REL,ADCY4,NFKB1,RARA,PRKAR2B,CSNK2B,MED1,AKT2,CSNK2A1,SMAD7,SNW1,RELB,RXRA,TNIP1,STAT5B,RAC1,GT2F2H1                                 |
| Cell Cycle: G1/S Checkpoint Regulation                                    | 2.83E00                | 1.43E-01    | E2F6,E2F4,HDAC5,SUV39H1,CCNE1,CDKN2A,RB1,HDAC3,MAX                                                                                   |
| Estrogen-mediated S-phase Entry                                           | 2.49E00                | 2.08E-01    | E2F6,E2F4,CCNE1,CCNA2,RB1                                                                                                            |
| Retinoic acid Mediated Apoptosis Signaling                                | 2.48E00                | 1.38E-01    | IRF1,RARA,PARP11,ZC3HAV1,TNKS2,RXRA,CASP3,TNFRSF10B                                                                                  |
| Small Cell Lung Cancer Signaling                                          | 2.47E00                | 1.27E-01    | PIAS3,NFKB1,PIK3C2A,SUV39H1,CCNE1,RXRA,RB1,MAX,AKT2                                                                                  |
| Protein Ubiquitination Pathway                                            | 2.45E00                | 8.27E-02    | DNAJC6,UBE2L3,USP22,DNAJB7,USP14,UBE2V1,DNAJB12,UBE2N,BIRC3,USP36,USP46,PSMC2,HLA-A,USP12,HSPA5,PSMA2,HLA-C,DNAJB4,HSPH1,PSMB2,PSMD2 |
| Cell Cycle Regulation by BTG Family Proteins                              | 2.45E00                | 1.71E-01    | E2F6,E2F4,CCNE1,PPP2R5D,RB1,PPP2CA                                                                                                   |
| JAK/Stat Signaling                                                        | 2.42E00                | 1.25E-01    | PIAS3,GNAQ,NFKB1,SOCS5,PIK3C2A,SOCS4,SOCS6,STAT5B,AKT2                                                                               |
| Superpathway of Geranylgeranyldiphosphate Biosynthesis I (via Mevalonate) | 2.38E00                | 2.5E-01     | HMGCS1,HMGCR,FNTB,HADHB                                                                                                              |
| Neuroprotective Role of THOP1 in Alzheimer's Disease                      | 2.15E00                | 1.5E-01     | HLA-A,MME,PRKAR2B,HLA-C,PNOC,GNRH1                                                                                                   |
| CTLA4 Signaling in Cytotoxic T Lymphocytes                                | 2.05E00                | 1.1E-01     | HLA-A,PIK3C2A,CLTA,PPP2R5D,HLA-C,CLTB,AKT2,CTLA4,PPP2CA                                                                              |



|                                                       |         |          |                                                              |
|-------------------------------------------------------|---------|----------|--------------------------------------------------------------|
| Role of CHK Proteins in Cell Cycle Checkpoint Control | 2.04E00 | 1.27E-01 | E2F6,E2F4,RFC1,TLK2,PPP2R5D,HUS1,PPP2CA                      |
| TR/RXR Activation                                     | 1.95E00 | 1.06E-01 | LDLR,PIK3C2A,MED1,HIF1A,RXRA,BCL3,HDAC3,AKT2,THRB            |
| Endoplasmic Reticulum Stress Pathway                  | 1.94E00 | 1.9E-01  | HSPA5,CASP3,MBTPS1,EIF2AK3                                   |
| Type I Diabetes Mellitus Signaling                    | 1.92E00 | 9.9E-02  | IRF1,NFKB1,HLA-A,SOCS5,HLA-DMA,SOCS4,CASP3,HLA-C,SOCS6,RIPK1 |
| Mevalonate Pathway I                                  | 1.88E00 | 2.5E-01  | HMGCS1,HMGCR,HADHB                                           |
| Virus Entry via Endocytic Pathways                    | 1.83E00 | 1.01E-01 | HLA-A,PIK3C2A,CLTA,DNM2,HLA-C,CLTB,RAC1,TFRC,ITGA5           |

**Supplementary Table 3B. Canonical pathways for down-regulated genes in CD8<sup>+</sup> T<sub>EMRA</sub> cells from individuals with short telomeres compared to young controls**

| <i>Ingenuity Canonical Pathway</i>                           | <i>-log(P-value)**</i> | <i>R***</i> | <i>Molecules</i>                                                                                                                                                                                                                                           |
|--------------------------------------------------------------|------------------------|-------------|------------------------------------------------------------------------------------------------------------------------------------------------------------------------------------------------------------------------------------------------------------|
| Natural Killer Cell Signaling                                | 4.11E00                | 2.08E-01    | PAK2,PIK3R3,AKT3,RRAS2,CD244,LILRB1,KIR3DL1,KLRB1,KLRC3,PIK3C2B,FCER1G,KLRC1,SOS1,FCGR2A,NCR3,PIK3CA,CD300A,KLRC2,SH3BP2,PRKCB,PTPN6,FCGR3A/FCGR3B                                                                                                         |
| Chronic Myeloid Leukemia Signaling                           | 3.6E00                 | 2.07E-01    | CTBP1,TGFB3,HDAC2,CDK4,PIK3R3,AKT3,RRAS2,RBL2,HDAC8,PIK3C2B,IKBKB,SOS1,MYC,PIK3CA,CTBP2,TGFBR1,MDM2,HDAC4,CDK6                                                                                                                                             |
| Glucocorticoid Receptor Signaling                            | 3.53E00                | 1.52E-01    | HSPA1A/HSPA1B,MAPK14,AKT3,CREB1,PRKAA1,SMARCA2,NR3C2,PRKACB,NCOA3,FOS,A2M,POLR2L,FKBP5,PIK3CA,DUSP1,CD3D,CREBBP,TGFBR1,NFAT5,GTF2E1,TAF15,TGFB3,PIK3R3,RRAS2,NCOA1,SMAD2,PPP3CB,IKBKB,PIK3C2B,HLTF,POLR2C,PPP3CA,SOS1,BCL2,IL5,GTTF2H5,FOXO3,PRKAB2,GTF2H1 |
| RAR Activation                                               | 3.46E00                | 1.68E-01    | MAPK14,PML,PTEN,AKT3,SMARCA2,NSD1,PRKACB,FOS,PIK3CA,DUSP1,PRKCB,CREBBP,PNPLA4,TGFB3,PIK3R3,RDH11,NCOA1,CSNK2B,SMAD2,RXRβ,HLTF,PRMT1,PARP1,PDPK1,SMAD5,PRMT2,GTTF2H5,ADCY9,GTF2H1                                                                           |
| Valine Degradation I                                         | 3.34E00                | 3.89E-01    | HIBCH,HIBADH,AUH,ALDH6A1,DBT,BCKDHB,HADHA                                                                                                                                                                                                                  |
| DNA Double-Strand Break Repair by Non-Homologous End Joining | 3.19E00                | 4.29E-01    | PARP1,RAD50,XRCC1,PRKDC,XRCC4,MRE11A                                                                                                                                                                                                                       |
| Endometrial Cancer Signaling                                 | 2.92E00                | 2.31E-01    | CTNNA1,MYC,PIK3R3,PDPK1,AKT3,PTEN,PIK3CA,RRAS2,LEF1,PIK3C2B,FOXO3,SOS1                                                                                                                                                                                     |
| FAK Signaling                                                | 2.63E00                | 1.86E-01    | ASAP1,PAK2,PTEN,PIK3R3,AKT3,TLN1,RRAS2,VCL,PIK3C2B,GIT2,ACTA2,SOS1,PDPK1,CAPN5,PIK3CA,ARHGAP26                                                                                                                                                             |
| DNA Double-Strand Break Repair by Homologous Recombination   | 2.32E00                | 3.57E-01    | POLA1,RAD52,RAD50,ATRX,MRE11A                                                                                                                                                                                                                              |
| Nur77 Signaling in T Lymphocytes                             | 2.32E00                | 2.17E-01    | MAP2K5,HDAC2,CD28,APAF1,HLA-DQA1,CD3D,BCL2,PPP3CB,FCER1G,PPP3CA                                                                                                                                                                                            |
| Glioblastoma Multiforme Signaling                            | 2.23E00                | 1.52E-01    | PLCB1,CDC42,CDK4,PTEN,PIK3R3,AKT3,PDGFR,RRAS2,LEF1,PIK3C2B,RHOQ,S                                                                                                                                                                                          |

|                                        |         |          |                                                                                                                                                                                                                                                                     |
|----------------------------------------|---------|----------|---------------------------------------------------------------------------------------------------------------------------------------------------------------------------------------------------------------------------------------------------------------------|
|                                        |         |          | OS1,APC,FZD4,MYC,PIK3CA,MDM2,PLC L2,WNT4,CDK6,TSC1,NF1                                                                                                                                                                                                              |
| TGF- $\beta$ Signaling                 | 2.18E00 | 1.72E-01 | TGFB3,MAPK14,CDC42,RRAS2,SMAD2, SMURF2,ACVR2A,SOS1,FOS,SMAD5,BCL2,CREBBP,TGFBR1,ACVR1,RUNX2                                                                                                                                                                         |
| Small Cell Lung Cancer Signaling       | 2.17E00 | 1.83E-01 | CDK4,PTEN,PIK3R3,AKT3,APAF1,PIK3C 2B,IKBKB,RXR8,MYC,PIK3CA,SKP2,BCL 2,CDK6                                                                                                                                                                                          |
| Hereditary Breast Cancer Signaling     | 2.17E00 | 1.61E-01 | HDAC2,CDK4,PTEN,PIK3R3,AKT3,RAD5 0,RRAS2,HDAC8,SMARCA2,PIK3C2B,HL TF,POLR2C,POLR2L,PIK3CA,CREBBP,H DAC4,CDK6,MRE11A                                                                                                                                                 |
| PPAR $\alpha$ /RXR $\alpha$ Activation | 2.15E00 | 1.45E-01 | PLCB1,TGFB3,MAPK14,RRAS2,SMAD2,P RKA1,IKBKB,ACVR2A,MED24,PRKACB, CLOCK,SOS1,NCOA3,ACOX1,IL18RAP,A P2A2,PRKCB,CREBBP,TGFBR1,PLCL2,A CVR1,ADCY9,PRKAB2,GPD2                                                                                                           |
| iCOS-iCOSL Signaling in T Helper Cells | 2.05E00 | 1.63E-01 | PTEN,PIK3R3,AKT3,HLA- DQA1,PPP3CB,PIK3C2B,IKBKB,FCER1G, PPP3CA,PDPK1,CD28,PIK3CA,TRAT1,C D3D,CAMK2G,NFAT5                                                                                                                                                           |
| B Cell Receptor Signaling              | 2.05E00 | 1.43E-01 | MAPK14,CDC42,PAG1,PTEN,PIK3R3,AK T3,RRAS2,CREB1,PPP3CB,PIK3C2B,IKB KB,EGR1,GAB1,PPP3CA,SOS1,FCGR2A, PDPK1,PIK3CA,PIK3AP1,CAMK2G,PRKB, CREBBP,PTPN6,NFAT5                                                                                                            |
| Molecular Mechanisms of Cancer         | 2.02E00 | 1.23E-01 | MAPK14,CDC42,AKT3,APAF1,PTCH1,RH OQ,GAB1,PRKACB,APC,FOS,HHAT,PIK3 CA,PRKCB,CREBBP,XIAP,TGFBR1,CDK6 ,PRKDC,NF1,CTNNA1,PLCB1,TGFB3,PA K2,CDK4,PIK3R3,RRAS2,SMAD2,LEF1,PI K3C2B,NLK,SOS1,FZD4,MYC,RALBP1,S MAD5,BCL2,CAMK2G,RALA,RASGRF2,W NT4,MDM2,HIPK2,ADCY9,CDC25B |
| CD28 Signaling in T Helper Cells       | 1.99E00 | 1.57E-01 | CDC42,PIK3R3,AKT3,HLA- DQA1,PPP3CB,PIK3C2B,IKBKB,FCER1G, PPP3CA,FOS,ARPC5,PDPK1,CD28,PIK3 CA,CD3D,PTPN6,NFAT5                                                                                                                                                       |
| Neurotrophin/TRK Signaling             | 1.97E00 | 1.79E-01 | FOS,MAP2K5,CDC42,PIK3R3,PDPK1,PIK 3CA,RRAS2,CREB1,PIK3C2B,CREBBP,G AB1,SOS1                                                                                                                                                                                         |

**Supplementary Table 4A. Canonical pathways for up-regulated genes in sorted CD8<sup>+</sup> T<sub>EMRA</sub> cells from older adults with normal telomere length compared to young controls**

| <i>Ingenuity Canonical Pathway</i>     | <i>-log(P-value)*</i> | <i>R**</i> | <i>Molecules</i>                                                                                                                          |
|----------------------------------------|-----------------------|------------|-------------------------------------------------------------------------------------------------------------------------------------------|
| Allograft Rejection Signaling          | 6.15E00               | 3.5E-01    | HLA-DPB1,HLA-DOA,HLA-DQA1,HLA-DQB1,HLA-DRB4,HLA-DRA,HLA-A,HLA-DRB1,HLA-DMA,TNF,HLA-DMB,HLA-DPA1,HLA-C,FAS                                 |
| Antigen Presentation Pathway           | 6.09E00               | 3.71E-01   | HLA-DPB1,HLA-DOA,CD74,HLA-DQA1,HLA-DRB4,HLA-DRA,HLA-A,HLA-DRB1,HLA-DMA,HLA-DMB,HLA-DPA1,HLA-C,CIIITA                                      |
| OX40 Signaling Pathway                 | 5.2E00                | 2.98E-01   | HLA-DPB1,CD3E,HLA-DOA,HLA-DQA1,HLA-DQB1,HLA-DRB4,HLA-DRA,HLA-A,HLA-DRB1,MAP2K4,HLA-DMA,HLA-DMB,HLA-DPA1,HLA-C                             |
| Apoptosis Signaling                    | 5.13E00               | 2.27E-01   | MAP4K4,BCL2L11,CAPN1,MAP3K14,IKBKB,BAD,BIRC3,PARP1,CAPN3,MAP2K4,BCL2A1,TNF,RPS6KA1,CASP3,DFFB,FAS,BID,CASP8,MAPK3,SPTAN1                  |
| Type I Diabetes Mellitus Signaling     | 4.72E00               | 2.08E-01   | IRF1,CD3E,HLA-DOA,MYD88,HLA-DQA1,HLA-DQB1,MAP3K14,HSPD1,IKBKB,HLA-DRA,HLA-A,HLA-DRB1,MAP2K4,HLA-DMA,TNF,HLA-DMB,CASP3,HLA-C,FAS,BID,CASP8 |
| Graft-versus-Host Disease Signaling    | 4.7E00                | 3.08E-01   | HLA-DRB1,HLA-A,HLA-DOA,HLA-DMA,HLA-DQA1,HLA-DQB1,TNF,KIR2DL1/KIR2DL3,HLA-DMB,HLA-C,FAS,HLA-DRA                                            |
| iCOS-iCOSL Signaling in T Helper Cells | 3.89E00               | 1.94E-01   | CD3E,HLA-DOA,PIK3C2A,HLA-DQA1,HLA-DQB1,CHP1,IKBKB,NFATC1,AKT2,BAD,HLA-DRA,HLA-DRB1,PIK3CD,ITPR3,HLA-DMA,CAMK2G,HLA-DMB,RAC1,SHC1          |
| IL-4 Signaling                         | 3.62E00               | 2.11E-01   | RPS6KB2,HLA-DOA,PIK3C2A,HLA-DQA1,HLA-DQB1,JAK3,NFATC1,AKT2,HLA-DRA,HLA-DRB1,PIK3CD,HLA-DMA,HLA-DMB,SYNJ2,SHC1                             |
| Autoimmune Thyroid Disease Signaling   | 3.6E00                | 2.78E-01   | HLA-DRB1,HLA-A,HLA-DOA,HLA-DMA,HLA-DQA1,HLA-DQB1,HLA-DMB,HLA-C,FAS,HLA-DRA                                                                |

|                                                           |         |          |                                                                                                                                               |
|-----------------------------------------------------------|---------|----------|-----------------------------------------------------------------------------------------------------------------------------------------------|
| tRNA Charging                                             | 3.39E00 | 2.63E-01 | WARS2,CARS2,MARS,HARS,CARS,YARS2,FARSB,AARS2,WARS,QARS                                                                                        |
| Death Receptor Signaling                                  | 3.35E00 | 1.87E-01 | MAP4K4,MAP3K14,IKBKB,ACTA2,BIRC3,TNFRSF10B,PARP1,PARP11,MAP2K4,ZC3HAV1,TNF,CASP3,DFFB,FAS,BID,CASP8,SPTAN1                                    |
| PKCθ Signaling in T Lymphocytes                           | 3.33E00 | 1.76E-01 | CD3E,HLA-DOA,PIK3C2A,HLA-DQA1,HLA-DQB1,MAP3K14,CHP1,IKBKB,NFATC1,MAP3K13,HLA-DRA,HLA-DRB1,PIK3CD,MAP2K4,HLA-DMA,CAMK2G,HLA-DMB,RAC1,MAPK3     |
| Cytotoxic T Lymphocyte-mediated Apoptosis of Target Cells | 3.31E00 | 3.08E-01 | CD3E,HLA-A,CASP3,HLA-C,DFFB,FAS,BID,CASP8                                                                                                     |
| Nur77 Signaling in T Lymphocytes                          | 3.28E00 | 2.39E-01 | CD3E,HLA-DRB1,HLA-DOA,HLA-DMA,HLA-DQA1,HLA-DQB1,CHP1,HLA-DMB,CASP3,NFATC1,HLA-DRA                                                             |
| Small Cell Lung Cancer Signaling                          | 3.1E00  | 1.97E-01 | CCNE2,PIAS3,CDK4,PIK3C2A,CDK2,IKBKB,MAX,AKT2,PIK3CD,SUV39H1,SKP2,TRAF1,RB1,BID                                                                |
| Cdc42 Signaling                                           | 3.07E00 | 1.64E-01 | HLA-DPB1,CD3E,HLA-DOA,HLA-DQA1,HLA-DQB1,MYL6B,HLA-DRB4,WASL,APC,CFL2,HLA-DRA,HLA-A,HLA-DRB1,MAP2K4,HLA-DMA,ITGB1,HLA-DMB,HLA-DPA1,HLA-C,EXOC7 |
| Polyamine Regulation in Colon Cancer                      | 3.05E00 | 3.18E-01 | OAZ1,OAZ2,PSMF1,SAT2,MAX,AZIN1,APC                                                                                                            |
| Myc Mediated Apoptosis Signaling                          | 2.92E00 | 2.07E-01 | PIK3CD,PIK3C2A,MAP2K4,CDKN2A,CASP3,FAS,YWHAE,BID,AKT2,SHC1,BAD,CASP8                                                                          |
| Tumoricidal Function of Hepatic Natural Killer Cells      | 2.8E00  | 2.92E-01 | SERPINB9,CASP3,DFFB,FAS,BID,M6PR,CASP8                                                                                                        |
| Calcium-induced T Lymphocyte Apoptosis                    | 2.74E00 | 2.08E-01 | CD3E,PRKCD,HLA-DRB1,HLA-DOA,ITPR3,HLA-DMA,HLA-DQA1,HLA-DQB1,CHP1,HLA-DMB,HLA-DRA                                                              |
| Allograft Rejection Signaling                             | 6.15E00 | 3.5E-01  | HLA-DPB1,HLA-DOA,HLA-DQA1,HLA-DQB1,HLA-DRB4,HLA-DRA,HLA-A,HLA-DRB1,HLA-DMA,TNF,HLA-DMB,HLA-DPA1,HLA-C,FAS                                     |

**Supplementary Table 4B. Canonical pathways for down-regulated genes in CD8<sup>+</sup> T<sub>EMRA</sub> cells from older adults with normal telomere length compared to young controls**

| <i>Ingenuity Canonical Pathway</i>                                   | <i>-log(P-value)**</i> | <i>R***</i> | <i>Molecules</i>                                                                                                                                                                |
|----------------------------------------------------------------------|------------------------|-------------|---------------------------------------------------------------------------------------------------------------------------------------------------------------------------------|
| All-trans-decaprenyl Diphosphate Biosynthesis                        | 2.39E00                | 1E00        | PDSS2,PDSS1                                                                                                                                                                     |
| Heparan Sulfate Biosynthesis                                         | 2.3E00                 | 1.73E-01    | CHST2,HS3ST3B1,HS2ST1,GLCE,NDST1,B3GALT6,UST,B3GAT2,EXTL2                                                                                                                       |
| Glucocorticoid Receptor Signaling                                    | 2.18E00                | 1.05E-01    | HSPA1A/HSPA1B,CREB1,TAF4B,NR3C2,PRKAG2,POLR2L,GTF2F1,CDKN1C,NFAT5,MAPK8,NRIP1,MAP3K7,TGFB3,CHUK,PIK3R3,RRAS2,SMAD2,HLTF,POLR2C,PPP3CA,HSPA4,PPP3R1,BCL2,IL5,PRKAG1,ICAM1,PRKAB2 |
| IGF-1 Signaling                                                      | 2.12E00                | 1.35E-01    | PIK3R3,IRS2,SOCS5,RRAS2,PRKAG2,CSNK2A1,IGF1R,NEDD4,SOCS7,IGFBP7,MAPK8,PRKAG1,FOXO1                                                                                              |
| Regulation of IL-2 Expression in Activated and Anergic T Lymphocytes | 2.08E00                | 1.45E-01    | MALT1,TGFB3,CD28,CHUK,RRAS2,PPP3R1,SMAD2,NFAT5,MAPK8,PPP3CA,VAV3                                                                                                                |
| Citrulline Biosynthesis                                              | 1.95E00                | 3.75E-01    | ALDH18A1,ARG1,GLS                                                                                                                                                               |
| Role of JAK2 in Hormone-like Cytokine Signaling                      | 1.85E00                | 1.88E-01    | SH2B3,SOCS7,IRS2,SOCS5,HLTF,EPOR                                                                                                                                                |
| Assembly of RNA Polymerase I Complex                                 | 1.79E00                | 3.33E-01    | POLR1B,TAF1A,POLR1C                                                                                                                                                             |
| Branched-chain $\alpha$ -keto acid Dehydrogenase Complex             | 1.65E00                | 5E-01       | DLD,DBT                                                                                                                                                                         |
| Heparan Sulfate Biosynthesis (Late Stages)                           | 1.65E00                | 1.56E-01    | CHST2,HS3ST3B1,HS2ST1,GLCE,NDST1,UST,EXTL2                                                                                                                                      |
| Insulin Receptor Signaling                                           | 1.54E00                | 1.11E-01    | PIK3R3,IRS2,RRAS2,PDE3B,PRKAG2,GAB1,GYS2,PPP1R3D,STXBPA,MAPK8,CRK,PRKAG1,SYNJ1,FOXO1                                                                                            |
| Chondroitin Sulfate Biosynthesis                                     | 1.47E00                | 1.43E-01    | CHST2,HS3ST3B1,HS2ST1,NDST1,B3GALT6,UST,B3GAT2                                                                                                                                  |
| Galactose Degradation I (Leloir Pathway)                             | 1.45E00                | 4E-01       | GALE,GALK2                                                                                                                                                                      |
| dTMP De Novo Biosynthesis                                            | 1.45E00                | 4E-01       | DHFR,TYMS                                                                                                                                                                       |
| Natural Killer Cell Signaling                                        | 1.44E00                | 1.13E-01    | PIK3R3,KIR2DL2,RRAS2,KLRC2,PRKD3,KIR3DL1,PAK1,KLRB1,KLRC3,KLRC1,SYNJ1,VAV3                                                                                                      |
| B Cell Receptor Signaling                                            | 1.41E00                | 1.01E-01    | MAP3K7,PIK3R3,CHUK,RRAS2,CREB1,EGFR1,GAB1,PPP3CA,MALT1,PPP3R1,PIK                                                                                                               |

|                                               |         |          |                                                                                                                                                         |
|-----------------------------------------------|---------|----------|---------------------------------------------------------------------------------------------------------------------------------------------------------|
|                                               |         |          | 3AP1,MAPK8,NFAT5,MAP3K4,SYNJ1,FOXO1,VAV3                                                                                                                |
| PKC $\theta$ Signaling in T Lymphocytes       | 1.39E00 | 1.11E-01 | MALT1,MAP3K7,PIK3R3,CD28,CHUK,RRAS2,PPP3R1,NFAT5,MAPK8,MAP3K4,PPP3CA,VAV3                                                                               |
| Dermatan Sulfate Biosynthesis                 | 1.35E00 | 1.35E-01 | CHST2,HS3ST3B1,HS2ST1,NDST1,B3GALT6,UST,B3GAT2                                                                                                          |
| Colanic Acid Building Blocks Biosynthesis     | 1.34E00 | 2.31E-01 | MPI,GALE,GALK2                                                                                                                                          |
| Xenobiotic Metabolism Signaling               | 1.32E00 | 9.2E-02  | ABCB1,MAP2K5,CHST2,HS3ST3B1,MAP3K7,GSTO2,PIK3R3,CYP3A7,HS2ST1,RRAS2,PRKD3,GSTM3,ALDH18A1,NQO1,UST,ALDH3A2,PPP2R2B,MAPK8,MAP3K4,NDST1,ALDH8A1,CUL3,NRIP1 |
| All-trans-decaprenyl Diphosphate Biosynthesis | 2.39E00 | 1E00     | PDSS2,PDSS1                                                                                                                                             |

\* P-value was calculated by Fisher's exact test (right-tailed).

\*\*R refers to the ratio of the number of genes in the indicated pathway divided by the total number of genes that make up that pathway.

**Supplementary Table 5. Human Flow Cytometry Antibodies Utilized (n=26)**

| <i><b>Marker</b></i> | <i><b>Fluorochrome</b></i> | <i><b>Clone</b></i> | <i><b>Manufacturer</b></i> |
|----------------------|----------------------------|---------------------|----------------------------|
| CD3                  | AF700                      | UCHT1               | Biologend                  |
| CD3                  | APC                        | UCHT1               | BD Biosciences             |
| CD3                  | FITC                       | UCHT1               | Biologend                  |
| CD4                  | AF488/FITC                 | RPA-T4              | BD Biosciences             |
| CD4                  | BV605                      | OKT-4               | BioLegend                  |
| CD4                  | PE-CY5                     | RPA-T4              | Biologend                  |
| CD4                  | PerCP/Cy5.5                | RPA-T4              | eBioscience                |
| CD8                  | AF700                      | OKT-8               | eBioscience                |
| CD8                  | PE-CF594                   | RPA-T8              | BD Biosciences             |
| CD8                  | V450                       | RPA-T8              | BD Biosciences             |
| CD8a                 | FITC                       | RPA-T8              | Biologend                  |
| CD8a                 | PE                         | RPA-T8              | eBioscience                |
| CD19                 | BV421                      | HIB19               | Biologend                  |
| CD19                 | BV650                      | HIB19               | Biologend                  |
| CD28                 | PE-CY7                     | CD28.2              | BD Biosciences             |
| CD31                 | FITC                       | WM59                | eBioscience                |
| CD31                 | PE                         | WM59                | Biologend                  |
| CD45RA               | APC/CY7                    | HI100               | Biologend                  |
| CD56                 | PE-CF594                   | B159                | BD Biosciences             |
| CD56                 | PE-CY7                     | HCD56               | Biologend                  |
| CD57                 | FITC                       | HCD57               | Biologend                  |
| CD95                 | PE-CF594                   | DX2                 | BD Biosciences             |
| CD197 (CCR7)         | BV421                      | G043H7              | Biologend                  |
| CD197 (CCR7)         | PE                         | 3D12                | eBioscience                |
| CD197 (CCR7)         | V450                       | 150503              | BD Biosciences             |
| CD279 (PD-1)         | APC                        | ebioJ105            | eBioscience                |



**Supplementary Table 6. Mouse Flow Cytometry Antibodies Utilized (n=18)**

| <i>Marker</i>                                            | <i>Fluorochrome</i> | <i>Clone #</i> | <i>Manufacturer</i> |
|----------------------------------------------------------|---------------------|----------------|---------------------|
| CD3                                                      | AF700               | 17A2           | Biolegend           |
| CD3e                                                     | PE                  | 145-2C11       | eBioscience         |
| CD4                                                      | FITC                | RM4-5          | Biolegend           |
| CD8a                                                     | APC                 | 53-6.7         | Biolegend           |
| CD8a                                                     | BV605               | 53-6.7         | Biolegend           |
| CD19                                                     | PECF594             | 1D3            | BD Biosciences      |
| CD19                                                     | PECY7               | 6D5            | Biolegend           |
| CD25                                                     | BV421               | BC61           | Biolegend           |
| CD44                                                     | PECY7               | IM7            | eBioscience         |
| CD45.1                                                   | AF700               | A20            | Biolegend           |
| CD45.1                                                   | PE                  | A20            | eBioscience         |
| CD45.2                                                   | PECY7               | 104            | BD Biosciences      |
| CD45.2                                                   | PerCP-Cy5.5         | 104            | Biolegend           |
| CD48                                                     | PECY7               | HM48-1         | BD Biosciences      |
| CD117 (c-kit)                                            | APC                 | 2B8            | eBioscience         |
| CD150 (SLAM)                                             | PE                  | TC15-12F12.2   | Biolegend           |
| Lineage panel:<br>CD3/GR1/CD11b/<br>CD45R (B220)/Ter-119 | FITC                | n/a            | Biolegend           |
| Ly-6a/e (sca-1)                                          | PE                  | E13-161.7      | Biolegend           |

mouse T cells  
IR total splenocytes

1:2000 Actin  
1:500 **pKap1**

Full unedited gel for Figure 5G

The same gel was stripped and re-probed for Kap1.

Two colors

8 lanes used for manuscript

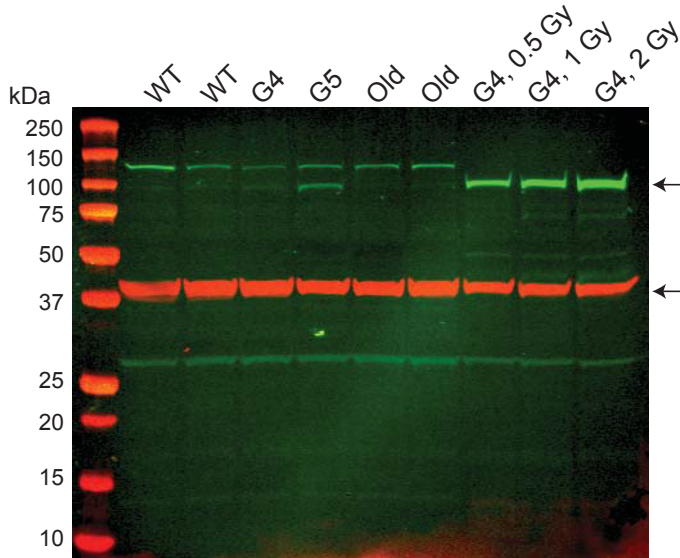

Black and white

8 lanes used for manuscript

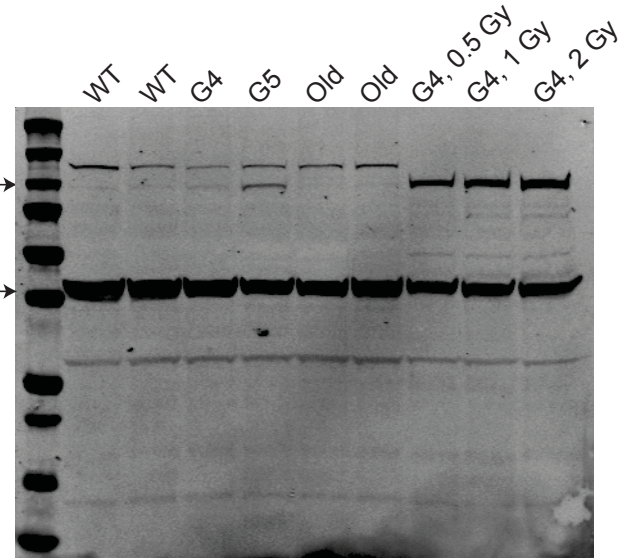

mouse T cells  
IR total splenocytes

1:2000 Actin  
1:1000 **Kap1**

Two colors

8 lanes used for manuscript

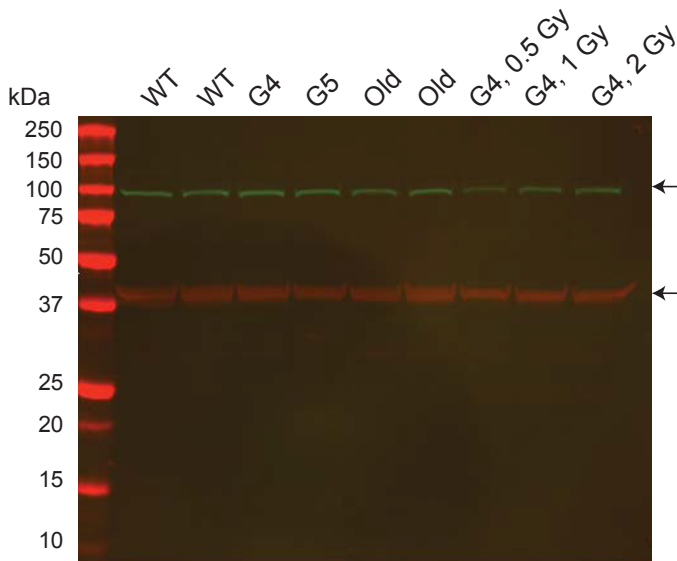

Black and white

8 lanes used for manuscript

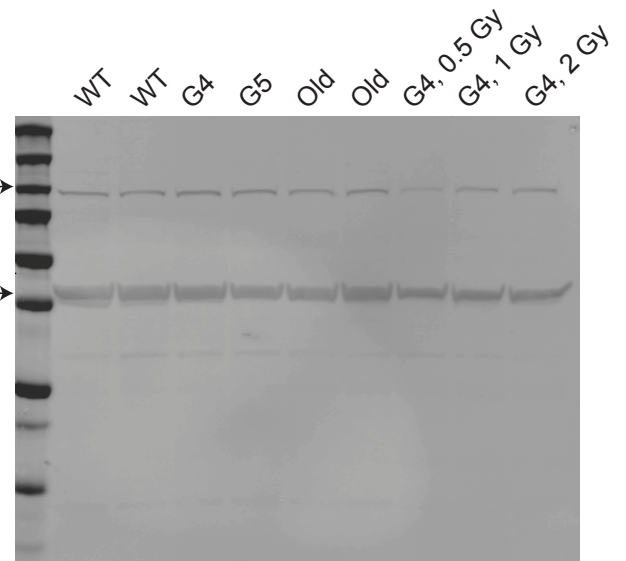

Supplement: sd1 [file 1]
